# Supplementary material for: A fully coupled 3-D ice-sheet–sea-level model: algorithm and applications
Source: Copernicus journal article supplement (doi:10.5194/gmd-7-2141-2014), 2014-09-23
Supplement: Supplementary file 1 [file gmd-7-2141-2014-supplement.zip]

# Supplementary material

## 1. Parameters

The parameters that are defined outside the subroutines presented in this document are shown here.

```
5  R_earth          = 6.371221E6_dp          ! Radius of the Earth in meters
   dx_anice40       = 40000._dp             ! Grid scale of ANICE: 40km for Nam, Eas, Ant; 20km for Grl
   ice_density      = 910.0_dp              ! Ice density in kg m^-3
   seawater_density = 1028.0_dp             ! Seawater density in kg m^-3
10  C_SLE%NP        = 2 * RES * (RES-1) * 20 + 12 ! All SELEN elements = 141612 (with RES = 60), equation (A1)
   C_SLE%NEL_ANICE = 26012                  ! All ice sheet elements of SELEN
   C_SLE%NN_NAM     = NX_nam * NY_nam        ! Number of grid points of North America = 21901
   C_SLE%NN_EAS     = NX_eas * NY_eas        ! Number of grid points of Eurasia = 17955
   C_SLE%NN_GRL     = NX_grl * NY_grl        ! Number of grid points of Greenland = 10857
   C_SLE%NN_ANT     = NX_ant * NY_ant        ! Number of grid points of Antarctica = 19881
   C_SLE%ALFA       = SQRT(4._dp / DBLE(C_SLE%NP)) ! Radius of SELEN elements, equation (A3)
   C_SLE%radice40   = dx_anice40 / (SQRT(C%pi) * R_earth) ! Radius of ANICE grid boxes, equation (A4) (20km for GRL)
```

## 2. Initial files for SELEN

This subroutine is used to include the ANICE ice loading and topography in the global fields of SELEN.

One example is given for the North American ice sheet, subroutines for the other four ice sheets are practically the same, see the different IF-statements on line 177-191. For Greenland an additional masking is used, to only include land points (lines 202,203 and lines 222,223). Moreover, the grid scale for North America, Eurasia and Antarctica is 40 km, for Greenland this is 20 km.

```
15  MODULE create_initial_selen_module
   ! Program to create the initial files for selen, first do this then run the Coupled model
   !
   ! The order of the ice sheets is NAM, EAS, GRL, ANT
   !
20  USE grid_main_module, ONLY: dp, C          ! Main definitions of parameters

   ! Longitude, latitude, initial ice thickness loading and initial bedrock topography of the four ice sheet in ANICE
   ! GRL_mask_ref is the land mask of Greenland (including 1 grid point of ocean around),
   ! used to determine the elements for Greenland in SELEN (see Fig. 3b)
25  USE grid_selen_module, ONLY: C_SLE, NAM_Long, NAM_Lat, NAM_Load_ref, NAM_Topo_ref, &
   EAS_Long, EAS_Lat, EAS_Load_ref, EAS_Topo_ref, &
   GRL_Long, GRL_Lat, GRL_Load_ref, GRL_Topo_ref, GRL_mask_ref, &
   ANT_Long, ANT_Lat, ANT_Load_ref, ANT_Topo_ref
   USE parameters_main_module, ONLY: R_earth, ice_density, seawater_density

30  IMPLICIT NONE

   INTEGER :: LOCAL_NEL

35  CONTAINS
   SUBROUTINE anice2pixels()
     integer :: n_ice
     integer :: i

40     INTEGER, DIMENSION(C_SLE%NP) :: anclonp, anclatp ! anchor points of each element
     INTEGER, DIMENSION(C_SLE%NP) :: of, fgi          ! ocean function (1=topo below sea level)
     INTEGER, DIMENSION(C_SLE%NP) :: of, fgi          ! floating function (1=floating ice, so no loading)
     INTEGER, DIMENSION(C_SLE%NP) :: icelab           ! label for the ice sheets, 1=nam, 2=eas, 3=grl, 4=ant

45     REAL(dp), DIMENSION(C_SLE%NP) :: lonp, latp    ! longitude and latitude for all element
     REAL(dp), DIMENSION(C_SLE%NP) :: hiel, topo     ! interpolated ice thickness, topography for all elements
     !
     ! -- Open initial file of all SELEN elements
     !
50     open(1,file='px-table-topo-res60-etopol.dat',status='unknown') ! new file: px-table-topo-res60-etopol.dat
     do i=1, C_SLE%NP
       read(1,*) lonp(i), latp(i), anclonp(i), anclatp(i), topo(i), of(i)
     end do
     close(1)

55     icelab = 0
     hiel    = 0._dp

60
```

```

!
! -- Loop over the 4 ice sheets: Nam, Eas, Grl, Ant
65 !
   call trig_converter_nam(C_SLE%NN_NAM,lonp,latp,anclonp,anclatp,topo,of,hiel,icelab)
   call trig_converter_eas(C_SLE%NN_EAS,lonp,latp,anclonp,anclatp,topo,of,hiel,icelab)
   call trig_converter_grl(C_SLE%NN_GRL,lonp,latp,anclonp,anclatp,topo,of,hiel,icelab)
   call trig_converter_ant(C_SLE%NN_ANT,lonp,latp,anclonp,anclatp,topo,of,hiel,icelab)
70 !
   ! determine floating ice and set loading to zero
   where (-topo*seawater_density > hiel*ice_density) fgi = 1
   where (-topo*seawater_density <= hiel*ice_density) fgi = 0
   where (fgi==1) hiel = 0._dp
75 !
! -- Write new file for all elements new ice loading and ocean function corrected for floating ice
!
   open(100,file='selen-px-topo-res60.pixelized',status='unknown',recl=4000)
   do i=1,C_SLE%NP
80     write(100,*) lonp(i), latp(i), anclonp(i), anclatp(i), of(i) * fgi(i), topo(i), hiel(i)
   end do
   close(100)
!
! -- Write new file with specific ANICE elements within SELEN
!
85   open(200,file='ice_loaded_pixels_anice_res60',status='unknown',recl=4000)
!
   n_ice=0
   do i=1, C_SLE%NP
90     ! Here icelab is saved and used in the model as ANICE_sle_icelab to define the SELEN elements for each ice sheet
     if(icelab(i) /= 0) then
       n_ice=n_ice+1
       write(200,*) lonp(i), latp(i), anclonp(i), anclatp(i), icelab(i)
     end if
95   end do

   LOCAL_NEL = n_ice    ! which is defined as NEL_ANICE = 26012

   END SUBROUTINE anice2pixels
!
100 ! -- Example for North America
!
   SUBROUTINE trig_converter_nam(nice,lonp,latp,anclonp,anclatp,topo,of,hiel,icelab)

105     INTEGER,                                INTENT(IN)      :: nice
     INTEGER, DIMENSION(C_SLE%NP), INTENT(IN)  :: anclonp, anclatp
     REAL(dp), DIMENSION(C_SLE%NP), INTENT(IN)  :: lonp, latp

     ! These fields are adjusted with the ANICE values
110     INTEGER, DIMENSION(C_SLE%NP), INTENT(INOUT) :: of           ! ocean function for global SELEN
     REAL(dp), DIMENSION(C_SLE%NP), INTENT(INOUT) :: topo         ! topography for global SELEN

     INTEGER, DIMENSION(C_SLE%NP), INTENT(OUT)  :: icelab         ! ice labels for global SELEN
     REAL(dp), DIMENSION(C_SLE%NP), INTENT(OUT) :: hiel           ! ice thickness for global SELEN
115     INTEGER                                     :: i, j
     INTEGER                                     :: pixcount,icecount

     REAL(dp)                                     :: intarea, deg
120     REAL(dp)                                     :: volice, voltopo
     REAL(dp)                                     :: hp, bp
     REAL(dp)                                     :: volratio, vol, volkm

     INTEGER, dimension(:), allocatable          :: anclontemp, anclatemp
125     REAL(dp), dimension(:), allocatable        :: lontemp, latemp, htemp, btemp
     REAL(dp), dimension(:), allocatable        :: hi

!
! -- Allocate arrays
!
130   allocate (hi (nice ))
   allocate (lontemp (1:C_SLE%NP))
   allocate (latemp (1:C_SLE%NP))
   allocate (anclontemp (1:C_SLE%NP))
   allocate (anclatemp (1:C_SLE%NP))
135   allocate (htemp (1:C_SLE%NP))
   allocate (btemp (1:C_SLE%NP))
!
! -- calculate volume of ice of rectangular grid of ANICE
!
140   volkm = 0._dp
   do i=1, nice
     volkm = volkm + C_SLE%dx_anice40 * C_SLE%dx_anice40 * NAM_Load_ref(i)
   end do
!
! -- calculate volume of ice for circular grid points of ANICE
145 !
   vol = 0._dp
   do i=1, nice
     vol = vol + 2._dp * C%pi * R_earth**2 * NAM_Load_ref(i) * (1._dp - COS(C_SLE%radice40))
   end do

```

```

150   if (vol == 0._dp .and. volkm == 0._dp) then
        volratio = 1._dp
    else if (vol > 0._dp .and. volkm > 0.) then
155       volratio = vol / volkm
    end if
    !
    ! -- set the ice thickness from the original ice-sheet grid
    !
    do i=1,nice
160       hi(i) = NAM_Load_ref(i)
    end do
    !
    ! -- calculate volume of ice on radial elements
    !
165       vol = 0._dp
        do i=1, nice
            vol = vol + 2._dp * C%pi * R_earth**2 * hi(i) * (1._dp - COS(C_SLE%radice40))
        end do
    !
170     ! -- interpolate the ice thickness to the SELEN elements
    !
    pixcount=0

175     ! Loop over all ANICE elements of SELEN
    DO i=1, C_SLE%NP

        !
        ! -- within each subroutine of the four regions, specific boundaries of the SELEN elements
        !      are set to circumvent SELEN elements that do not cover that specific region
180     !
        ! Specific boundaries for North America (in trig_converter_nam)
        IF (latp(i) >= 30._dp .and. latp(i) <= 85._dp .and. lonp(i) >= 180._dp .and. lonp(i) <= 350._dp) THEN

185         ! Specific boundaries for Eurasia (in trig_converter_eas)
        IF (latp(i) >= 40._dp .and. (lonp(i) >= 305._dp .or. lonp(i) <= 135._dp) ) THEN

            ! Specific boundaries for Greenland (in trig_converter_grl)
            IF (latp(i) >= 54._dp .and. latp(i) <= 90._dp .and. (lonp(i) >= 165._dp .or. lonp(i) <= 15._dp) ) THEN

190             ! Specific boundaries for Antarctica (in trig_converter_ant)
            IF(latp(i) <= -50._dp) THEN

                hp = 0._dp
                bp = 0._dp
195             icecount = 0
                volice = 0._dp
                voltopo = 0._dp

200             ! loop over the ice elements (converted into disks!)
            DO j=1, nice
                ! only in trig_converter_grl this is included for the Greenland ANICE points
                ! IF (GRL_mask_ref(j) == 1) THEN

205                 ! determine the angular distance between the SELEN and ANICE location
                deg = angdist(lonp(i),latp(i),NAM_Long(j),NAM_Lat(j))

                ! calculate the overlapping area of the two spheres
                if ( C%rad2deg * min(C_SLE%ALFA, C_SLE%radice40) <= (C%rad2deg * max(C_SLE%ALFA,C_SLE%radice40) - deg) ) then
210                     intarea = 2._dp * C%pi * R_earth**2 * (1._dp - COS(MIN(C_SLE%ALFA,C_SLE%radice40)))
                     icecount = icecount + 1
                     volice = volice + intarea * hi(j)
                     voltopo = voltopo + intarea * NAM_Topo_ref(j)

215                 else if ( C%rad2deg * (C_SLE%ALFA + C_SLE%radice40) > deg ) then
                     intarea = optintersect(C_SLE%ALFA, C_SLE%radice40, deg)
                     icecount = icecount + 1
                     volice = volice + intarea * hi(j)
                     voltopo = voltopo + intarea * NAM_Topo_ref(j)
220                 end if

                ! only in trig_converter_grl this is included for the Greenland ANICE points
                ! END IF
            END DO

225             ! set ice thickness on the SELEN elements and set ice label
            if (icecount > 0) then
                icelab(i) = 1      ! 1 for Nam, 2 for Eas, 3 for Grl, 4 for Ant
                pixcount = pixcount + 1

230             lontemp(pixcount) = lonp(i)
             latemp(pixcount) = latp(i)

235             anclontemp(pixcount) = anclonp(i)
             anclatemp(pixcount) = anclatp(i)

```

```

240      hp = volice / (2._dp * C%pi * R_earth**2 * (1._dp - COS(C_SLE%ALFA))) ! = area of pixel
      bp = voltopo / (2._dp * C%pi * R_earth**2 * (1._dp - COS(C_SLE%ALFA))) ! = area of pixel

      htemp(pixcount) = hp
      btemp(pixcount) = bp
    end if

245  end if
END DO ! end of loop over all elements NP
!
! -- calculate volume of ice:
250  !
      vol = 0._dp
      do i=1, pixcount
        vol = vol + 2._dp * C%pi * R_earth**2 * htemp(i) * (1._dp - COS(C_SLE%ALFA))
      end do

255  ! -- calculate the new volume ratio and correct the ice load
      !
      if (vol == 0._dp .and. volkm == 0._dp) then
        volratio = 1._dp
      else if (vol > 0._dp .and. volkm > 0._dp) then
260        volratio = vol / volkm
      endif

      do i=1,pixcount
265        htemp(i) = htemp(i) / volratio
      end do
      !
      ! -- set new ice load and topography in the global SELEN arrays
      !
270      do i=1,C_SLE%NP
        do j=1, pixcount
          if (anclonp(i) == anclontemp(j) .and. anclatp(i) == anclatemp(j)) then
            hiel(i) = htemp(j)
            topo(i) = btemp(j)
275            if (topo(i) > 0) of(i) = 0
            if (topo(i) <= 0) of(i) = 1
          end if
        end do
      end do

280      deallocate (hi)
      deallocate (lontemp)
      deallocate (latemp)
      deallocate (anclontemp)
      deallocate (anclatemp)
285      deallocate (htemp)

END SUBROUTINE trig_converter_nam

```

### 3. Interpolation of ice loading

This subroutine is used to interpolate the ice loading of ANICE on the SELEN grid. The basics are quite similar to the subroutine shown in section 2, only here the interpolation is performed for ice loading only. Again, we provide one example for North America, the routine is the same for the other models. Similarly, the grid scale for North America, Eurasia and Antarctica is 40 km, for Greenland this is 20 km.

```

290  MODULE interpolation_selen_module
      ! This model is used to interpolate the ice loading from the ANICE grid (e.g. NN_GRL)
      ! to the elements containing ice on the SELEN grid: NEL_ANICE

      USE grid_main_module, ONLY: dp, C
      USE grid_selen_module, ONLY: C_SLE, NAM_Long, NAM_Lat, &
295      EAS_Long, EAS_Lat, &
      GRL_Long, GRL_Lat, &
      ANT_Long, ANT_Lat
      ! Main definitions of parameters
      ! Longitude and latitude of the North American ice sheet
      ! Longitude and latitude of the Eurasian ice sheet
      ! Longitude and latitude of the Greenland ice sheet
      ! Longitude and latitude of the Antarctic ice sheet

      USE reference_selen_module, ONLY: ANICE_sle_lon, &
300      ANICE_sle_lat, &
      ANICE_sle_icelab
      ! Longitude of SELEN elements
      ! Latitudes of SELEN elements
      ! Ice label of SELEN elements, specific for each
      ! of the four ice sheets: 1=Nam, 2=Eus, 3=Grl, 4=Ant

      USE parameters_main_module, ONLY: R_earth
      ! Radius of the Earth

      IMPLICIT NONE

      CONTAINS
      SUBROUTINE interpolate_ice(nam_load, eas_load, grl_load, ant_load, int_ice_anice)
        ! Interpolating ice loading of the ANICE grid to the ice elements of SELEN

310        ! Input:
        REAL(dp), DIMENSION(C_SLE%NN_NAM), INTENT(IN) :: nam_load
        REAL(dp), DIMENSION(C_SLE%NN_EAS), INTENT(IN) :: eas_load
        REAL(dp), DIMENSION(C_SLE%NN_GRL), INTENT(IN) :: grl_load
        REAL(dp), DIMENSION(C_SLE%NN_ANT), INTENT(IN) :: ant_load
315        ! Ice thickness on land from North America
        ! Ice thickness on land from Eurasia
        ! Ice thickness on land from Greenland
        ! Ice thickness on land from Antarctica

        ! Output variables:
        REAL(dp), DIMENSION(C_SLE%NEL_ANICE), INTENT(OUT) :: int_ice_anice ! The interpolated ice thickness

320        WRITE(0,*) 'running interpolate_ice'

        ! Initialize the interpolated data is equal to the initial ice thickness:
        int_ice_anice = 0._dp

325        ! Call the interpolation routines for each ice sheet, depending on which ice sheets are used
        ! Determine which ice sheets are used in the model: Nam, Eas, Grl, Ant
        if(C%which_icesheets(1:1) == 'T') call trig_converter_nam(nam_load, int_ice_anice)
        if(C%which_icesheets(2:2) == 'T') call trig_converter_eas(eas_load, int_ice_anice)
        if(C%which_icesheets(3:3) == 'T') call trig_converter_grl(grl_load, int_ice_anice)
330        if(C%which_icesheets(4:4) == 'T') call trig_converter_ant(ant_load, int_ice_anice)

      END SUBROUTINE interpolate_ice

      !
      ! North America --- Only 1 example is show here, the subroutines for the other ice sheets are identical
      !
335      SUBROUTINE trig_converter_nam(nam_load, int_load_nam)
      !
      ! Input: ice thickness on land from North America of ANICE
      REAL(dp), DIMENSION(C_SLE%NN_NAM), INTENT(IN) :: nam_load

340      ! Output: interpolated ice thickness on SELEN elements
      REAL(dp), DIMENSION(C_SLE%NEL_ANICE), INTENT(OUT) :: int_load_nam

      INTEGER :: i,j

345      REAL(dp) :: intarea, deg
      REAL(dp) :: volice, vol, volkm, volratio
      REAL(dp) :: hp
      INTEGER :: icecount, pixcount

350      REAL(dp), dimension(C_SLE%NEL_ANICE) :: htemp
      REAL(dp), dimension(C_SLE%NN_NAM) :: hi

355      ! -- calculate volume of ice of rectangular grid of the ice-sheet model ANICE
      !
      volkm = 0._dp
      do i=1, C_SLE%NN_NAM
        volkm = volkm + C_SLE%dx_anice40 * C_SLE%dx_anice40 * nam_load(i) ! grid scale of Nam is 40 km
360      end do

```

```

365 ! -- calculate volume of ice for circular grid points of ANICE
!
vol = 0._dp
do i=1, C_SLE%NN_NAM
370   vol = vol + 2._dp * C%pi * R_earth**2 * nam_load(i) * (1._dp - COS(C_SLE%radice40))
end do
!
! -- calculate the ratio of the volume from the circular grid with that from the original ice grid
!
375   if (vol == 0._dp .and. volkm == 0._dp) then
volratio = 1._dp
else if (vol > 0._dp .and. volkm > 0._dp) then
volratio = vol / volkm
end if
!
380 ! -- set the ice thickness from the original ice-sheet grid
!
do i=1, C_SLE%NN_NAM
hi(i) = nam_load(i)
end do
385 !
! -- interpolate the ice thickness to the SELEN elements
!
pixcount = 0 ! counting the number of pixels for the ice sheet
390 !
! -- Loop over all ANICE elements
!
DO i=1, C_SLE%NEL_ANICE
! Specific boundaries for North America
395 IF (ANICE_sle_icelab(i) == 1) THEN
hp = 0._dp
icecount = 0
volice = 0._dp
400 ! loop over the ice elements (converted into disks!)
DO j=1, C_SLE%NN_NAM
! determine the angular distance between the SELEN and ANICE location
deg = angdist(ANICE_sle_lon(i), ANICE_sle_lat(i), NAM_Long(j), NAM_Lat(j))
405 ! calculate the overlapping area of the two spheres
if ( C%rad2deg * MIN(C_SLE%ALFA, C_SLE%radice40) <= (C%rad2deg * max(C_SLE%ALFA, C_SLE%radice40) - deg) ) then
intarea = 2._dp * C%pi * R_earth**2 * (1._dp - COS(MIN(C_SLE%ALFA, C_SLE%radice40)))
icecount = icecount + 1
volice = volice + intarea * hi(j)
410 else if ( C%rad2deg * (C_SLE%ALFA + C_SLE%radice40) > deg ) then
intarea = optintersect(C_SLE%ALFA, C_SLE%radice40, deg)
icecount = icecount + 1
volice = volice + intarea * hi(j)
415 end if
END DO
! count the number of pixels
if (icecount > 0) then
420   pixcount = pixcount + 1
hp = volice / (2._dp * C%pi * R_earth**2 * (1._dp - COS(C_SLE%ALFA))) ! = volume divided by the area of pixel
htemp(i) = hp
end if
425 END IF
END DO ! end of loop over all elements NEL_ANICE
!
! -- calculate the new volume of ice on the SELEN elements:
!
430 vol = 0._dp
do i=1, C_SLE%NEL_ANICE
if (ANICE_sle_icelab(i) == 1) then
vol = vol + 2._dp * C%pi * R_earth**2 * htemp(i) * (1._dp - COS(C_SLE%ALFA))
435 end if
end do
!
! -- calculate the new volume ratio and correct the ice load
!
440   if (vol == 0._dp .and. volkm == 0._dp) then
volratio = 1._dp
else if (vol > 0._dp .and. volkm > 0._dp) then
volratio = vol / volkm
endif
!
445 ! -- correct the interpolated ice thickness on the SELEN elements to conserve ice volume
!
WHERE(ANICE_sle_icelab == 1) int_load_nam = htemp / volratio
!
450 END SUBROUTINE trig_converter_nam

```

```

!
! =====
455 ! Function to calculate the angular distance between two points
FUNCTION angdist(lonp, latp, loni, lati) RESULT(deg)

    REAL(dp) :: lonp, latp, loni, lati

    ! Results:
    REAL(dp) :: deg

    deg = C%rad2deg * ACOS( (COS(C%deg2rad * (90._dp - latp)) * COS(C%deg2rad * (90._dp - lati)) ) + &
        (SIN(C%deg2rad * (90._dp - latp)) * SIN(C%deg2rad * (90._dp - lati)) * &
        COS(C%deg2rad * (lonp-loni)) ))

465 END FUNCTION angdist

!
! =====
470 ! Function to calculate the intersectional area of two spheres
FUNCTION optintersect(radp, radi, deg) RESULT(intarea)

    REAL(dp) :: radp, radi, deg

475 integer, parameter :: a=0
integer, parameter :: b=1

    REAL(dp) :: x ! = (1-(deg-abs(radp-radi))/(radp+radi-abs(radp-radi)))
    REAL(dp) :: smooth ! = ( (-2*((x-a)/(b-a))**3) + (3*((x-a)/(b-a))**2) )
480 ! Result
    REAL(dp) :: intarea

    x = 1._dp - (deg- C%rad2deg * abs(radp-radi)) / (C%rad2deg * (radp+radi-abs(radp-radi)))
    smooth = (-2._dp * ( (x-dble(a)/dble(b-a))**3) + (3._dp*(x-dble(a)/dble(b-a))**2)

485 intarea = 2._dp * C%pi * R_earth**2 * (1._dp - COS(MIN(radp,radi))) * smooth

    END FUNCTION optintersect
!
490 !
END MODULE interpolation_selen_module

```
