# Supplementary material for: A fully coupled 3-D ice-sheet–sea-level model: algorithm and applications
Source: Copernicus journal article supplement (doi:10.5194/gmd-7-2141-2014), 2014-09-23
Supplement: Supplementary file 2 [file gmd-7-2141-2014-supplement.zip]

## Supplementary Movie

### **Supplementary movie**

This movie shows the global fields of relative sea level (top left) and Ice thickness (bottom left) for the complete 410 kyr simulation, with a time step of 5 kyr. Relative sea level is shown with respect to the eustatic (which is indicated at the top right of the figure) and relative to present day. The eustatic contribution from the ice sheets is shown as the total change above the bottom right panel. The figures on the right show the difference of the standard run with a run not including the rotational feedbacks. Top right for relative sea level and bottom right for ice thickness.
