# Supplementary material for: A fully coupled 3-D ice-sheet–sea-level model: algorithm and applications
Source: Copernicus journal article supplement (doi:10.5194/gmd-7-2141-2014), 2014-09-23
Supplement: Supplementary file 3 [file gmd-7-2141-2014-supplement.zip]

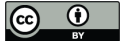

## *Supplement of*

# **A fully coupled 3-D ice-sheet–sea-level model: algorithm and applications**

**B. de Boer et al.**

*Correspondence to:* B. de Boer (b.deboer@uu.nl) and P. Stocchi (paolo.stocchi@nioz.nl)

- Supplement-Cover-Letter.pdf
- \_\_MACOSX
  - .\_deBoer\_etal\_suppl\_movie\_5kyr\_410ka.mov
- deBoer\_etal\_suppl\_material\_code.pdf
- deBoer\_etal\_suppl\_movie\_5kyr\_410ka.mov
- deBoer\_etal\_suppl\_movie\_caption.pdf
